# Supplementary material
Source: MDPI journal article supplement (https://www.mdpi.com/2813-2432/2/3/18)
Supplement: s1 [file s1]

# Financial Profitability and Consumer Preferences for Safe Broiler Production

## QUESTIONNAIRE

### 1. Information of the respondent:

a) Name of the Respondent: ..... b) Father's Name:.....  
 c)Address: Village: ..... Post: .....  
 Upazilla: ..... District:.....  
 Mobile No:.....

### 2. Family Consumption

| No. of family members: |      |     |                        |            |           |                 |                    |
|------------------------|------|-----|------------------------|------------|-----------|-----------------|--------------------|
| Sl. No.                | Name | Age | Relation with the Head | Occupation |           | Education Level | Farming Experience |
|                        |      |     |                        | Major      | Subsidary |                 |                    |
|                        |      |     |                        |            |           |                 |                    |
|                        |      |     |                        |            |           |                 |                    |
|                        |      |     |                        |            |           |                 |                    |
|                        |      |     |                        |            |           |                 |                    |
|                        |      |     |                        |            |           |                 |                    |

### 4. Farm Management related data:

- Total farm area (decimal).....Tk per decimal.....
- Land used for poultry shed (decimal).....Tk per decimal.....
- Rearing system (✓): ☐ Intensive ☐ Semi-intensive ☐ Extensive
- Types of rearing techniques (✓): ☐ Automation ☐ Manual
- Types of feed (✓) : ☐ Pellet ☐ Mash ☐ Hand mixing ☐ Others (specify)
- Flock size (✓) : ☐ Small ☐ Medium ☐ Large
- Number of sheds (✓) : ☐ Single shed .....☐ Two sheds..... ☐ three sheds.....
- Types of sheds (✓) : ☐ Kuccha & temporary ☐ Cemented ☐ Semi- cemented
- Vaccination (✓) : ☐ Yes ; if so, name of the vaccine..... ☐ No
- Are brooding and rearing houses different? ☐ Yes ☐ No
- Order of cleaning of feeder and waterer in a week (✓): ☐ Once ☐ Twice ☐ Thrice
- Maintaining of biosecurity (✓): ☐ Yes ☐ No
- Training status (✓) : ☐ trained ..... ☐ Untrained.....

### 14. 5. Total costs of safe broiler production for 1000 Birds

| Cost items           | Unit    | Unit price | Per farm quantity | Total cost (Tk.) |
|----------------------|---------|------------|-------------------|------------------|
| <b>Variable cost</b> |         |            |                   |                  |
| 1. Feed cost         | Kg      |            |                   |                  |
| 2. Day-old chick     | No.     |            |                   |                  |
| 3. Hired labor       | Man-day |            |                   |                  |

|                                            |     |  |  |  |
|--------------------------------------------|-----|--|--|--|
| 4. Veterinary service and medicine cost    | Tk. |  |  |  |
| 5. Electricity cost                        | Tk. |  |  |  |
| 6. Litter cost                             | Tk. |  |  |  |
| 7. Transportation cost                     | Tk. |  |  |  |
| 8. Repairing cost                          | Tk. |  |  |  |
| A. Total variable cost                     | Tk. |  |  |  |
| <b>Fixed cost</b>                          |     |  |  |  |
| 9. Depreciation of Housing cost            | Tk. |  |  |  |
| 9. Family labour cost                      | Tk. |  |  |  |
| 10. Depreciation of tools & equipment cost | Tk. |  |  |  |
| 11. Interest on operating cost             | Tk. |  |  |  |
| B. Total fixed cost                        |     |  |  |  |
| <b>Total cost (A+B)</b>                    |     |  |  |  |

**6. Gross returns from safe broiler production for 1000 birds**

| Particulars | Unit price | Quantity | Returns (Tk.) |
|-------------|------------|----------|---------------|
| Meat        |            |          |               |
| Egg         |            |          |               |
| Total       |            |          |               |

**7. Consumer opinion on the characteristics and nutritional value of safe broiler meat**

| Items                                        | Level of agreement |       |           |          |                   |
|----------------------------------------------|--------------------|-------|-----------|----------|-------------------|
|                                              | Strongly Agree     | Agree | Undecided | Disagree | Strongly Disagree |
| 1. Good source of protein                    |                    |       |           |          |                   |
| 2. Cheaper than other poultry                |                    |       |           |          |                   |
| 3. More expensive than conventional broilers |                    |       |           |          |                   |
| 4. Tasty compared to other poultry meat      |                    |       |           |          |                   |
| 5. Easy access to market                     |                    |       |           |          |                   |

|                                        |  |  |  |  |  |
|----------------------------------------|--|--|--|--|--|
| 6. The freshness of the meat is good   |  |  |  |  |  |
| 7. Availability year round             |  |  |  |  |  |
| 8. Good packaging method               |  |  |  |  |  |
| 9. Meat has a bad smell                |  |  |  |  |  |
| 10. Reasonable price of meat           |  |  |  |  |  |
| 11. Contains no artificial ingredients |  |  |  |  |  |

8. Determinants of consumer preferences in purchasing safe broilers

| Factors affecting                 | Respondent's response |       |           |          |                   |
|-----------------------------------|-----------------------|-------|-----------|----------|-------------------|
|                                   | Strongly Agree        | Agree | Undecided | Disagree | Strongly Disagree |
| 1. Price of safe broiler          |                       |       |           |          |                   |
| 2. Average price of other poultry |                       |       |           |          |                   |
| 3. Size of the safe broiler       |                       |       |           |          |                   |
| 4. Freshness of the meat          |                       |       |           |          |                   |
| 5. Color of the meat              |                       |       |           |          |                   |
| 6. Taste of the meat              |                       |       |           |          |                   |
| 7. Family income                  |                       |       |           |          |                   |
| 8. Family size                    |                       |       |           |          |                   |

9. Problems faced by farmers:

| Sl No. | Problems regarding the production of safe broiler | Sl No. | Probable solutions to the problems |
|--------|---------------------------------------------------|--------|------------------------------------|
| 1.     |                                                   | 1.     |                                    |
| 2.     |                                                   | 2.     |                                    |
| 3.     |                                                   | 3.     |                                    |
| 4.     |                                                   | 4.     |                                    |

10. Problems faced by consumers:

| Sl No. | Problems regarding the consumption of safe broilers | Sl No. | Probable solutions to the problems |
|--------|-----------------------------------------------------|--------|------------------------------------|
| 1.     |                                                     | 1.     |                                    |

|    |  |    |  |
|----|--|----|--|
| 2. |  | 2. |  |
| 3. |  | 3. |  |
| 4. |  | 4. |  |

Signature of the interviewer: .....

Date: .....
