# Supplementary material
Source: MDPI journal article supplement (https://www.mdpi.com/2813-2432/2/3/18)
Supplement: s1 [file s1]

Archive with 1 entries (1 files):
- commodities-2479295-supplementary.pdf
